# Supplementary material
Source: Springer Nature journal article supplement (https://www.springermedizin.de/resource/supplementary/12876_2014_1170_MOESM3_ESM.pdf/9438232)

A

TNF- $\alpha$ 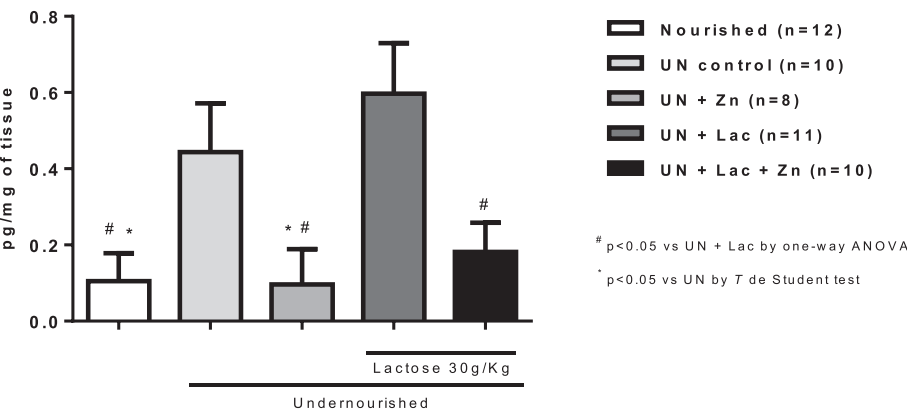

B

IL-1 $\beta$ 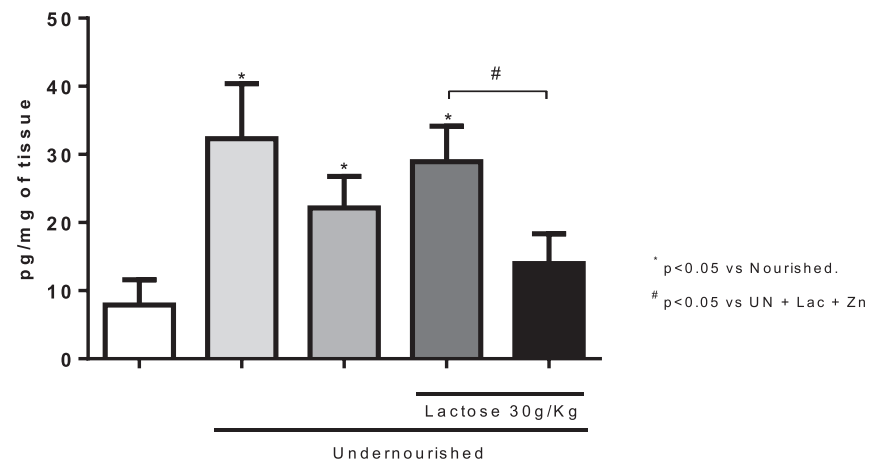

C

IL-10

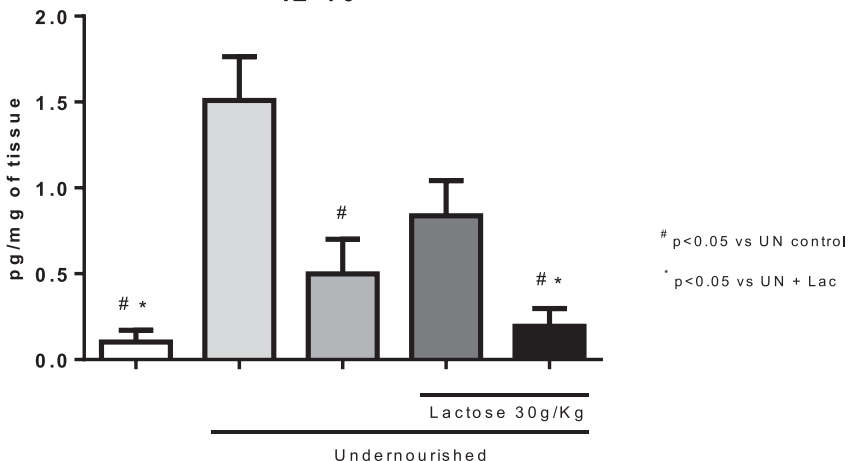

Supplement: MOESM3 [file 9438232]
